# Supplementary material
Source: PubMed Central journal article supplement (PMC3565465)

A

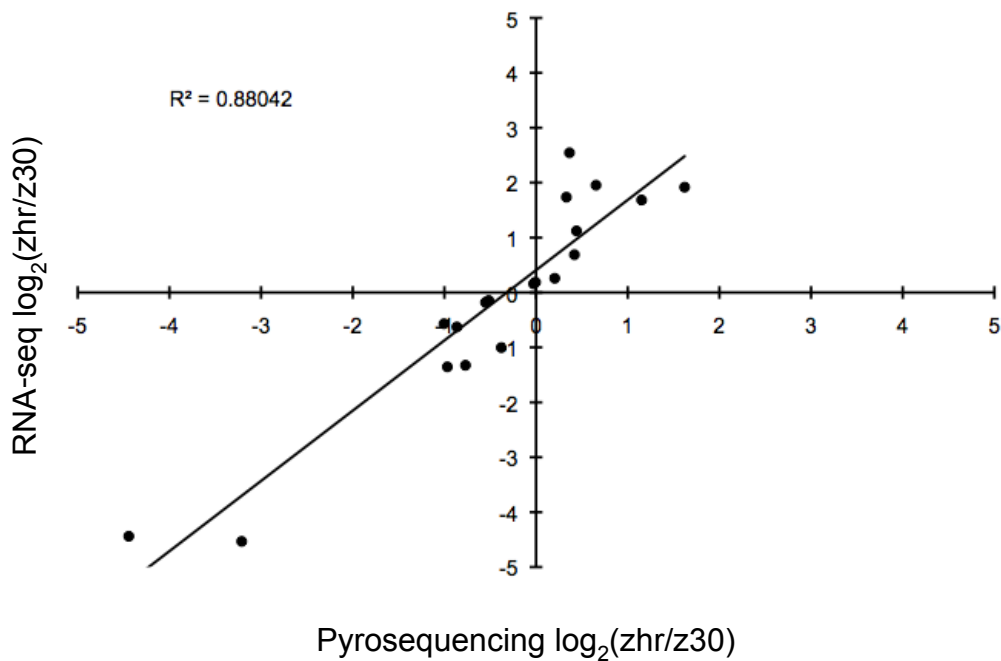

B

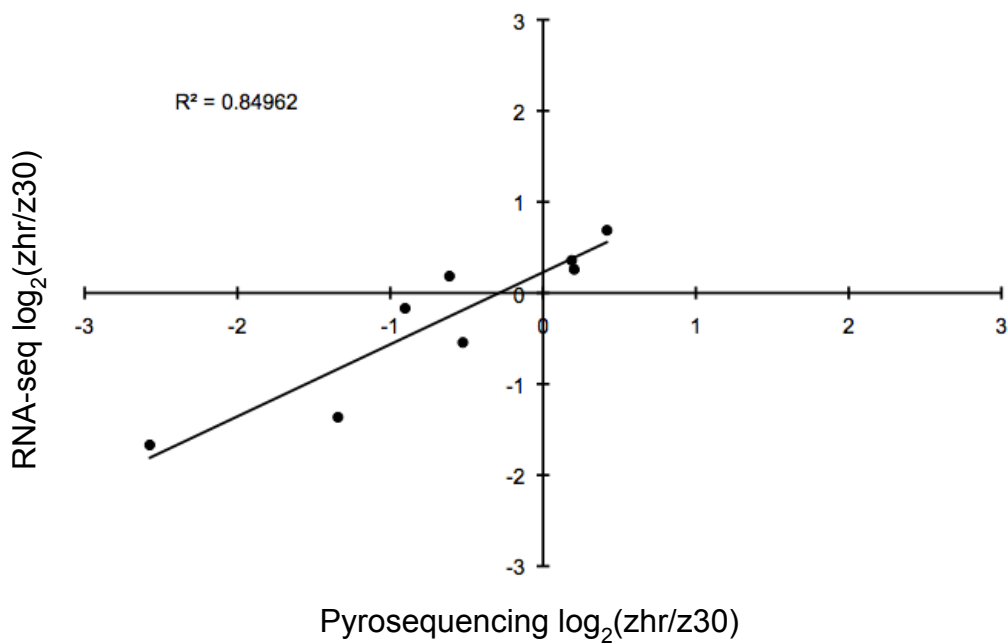

Supplement: NIHMS388433-supplement-Figure_S3.pdf [file NIHMS388433-supplement-Figure_S3.pdf]
